# Supplementary figures and images for: Orai3 Calcium Channel Contributes to Oral/Oropharyngeal Cancer Stemness through the Elevation of ID1 Expression
Source: MDPI journal article supplement (doi:10.3390/cells12182225), 2023-09-07

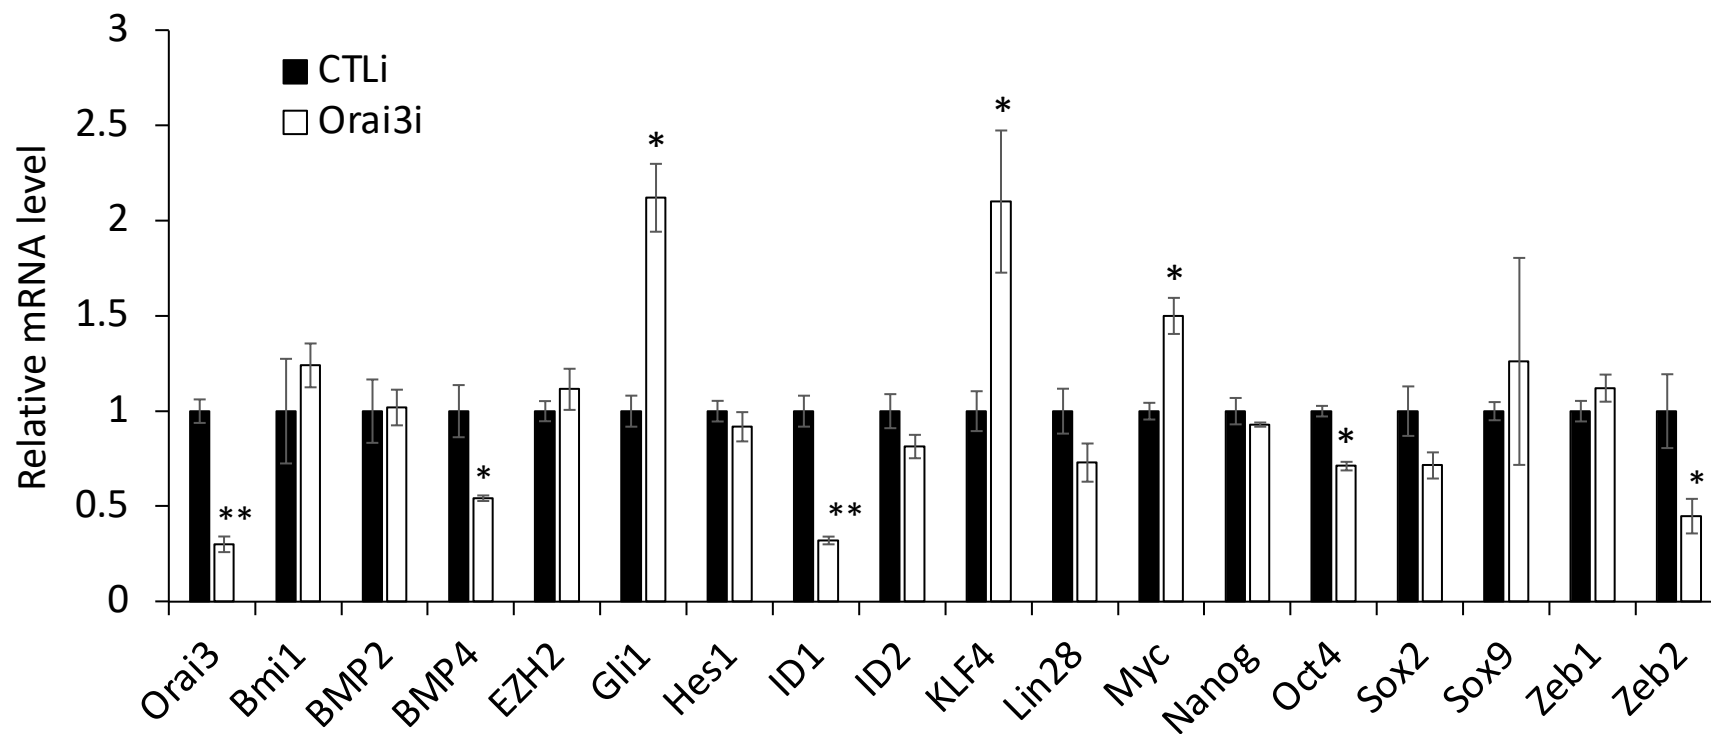

Supplement: s1 [file s1]
